# Supplementary material
Source: PubMed Central journal article supplement (PMC10363193)
Supplement: NIHMS1876540-supplement-1.pdf [file NIHMS1876540-supplement-1.pdf]

**Supplemental Table 1: Distribution of patients with optic neuritis treated with plasma exchange from the various centers**

| <b>France</b> | <b>Israel</b> | <b>New Zealand</b> | <b>Thailand</b> | <b>UK</b> | <b>US</b> |
|---------------|---------------|--------------------|-----------------|-----------|-----------|
| 163           | 12            | 19                 | 3               | 9         | 111       |
